# Supplementary material for: The molecular clock protein Bmal1 regulates cell differentiation in mouse embryonic stem cells
Source: Life Sci Alliance. 2020 Apr 13;3(5):e201900535. doi: 10.26508/lsa.201900535 (PMC7156284; doi:10.26508/lsa.201900535)
Supplement: Supplementary file 1 [file LSA-2019-00535_TableS1.xlsx]

## Sheet: RT-qPCR Oligos
Gene name		Oligo FW 5´-3´			Oligo RV 5´-3´
mNanog		GCATCTTCTGCTTCCTGGCAA			GAACTATTCTTGCTTACAAGGG
mOct4		GAGAAGGTGGAACCAACTCCCG			CCCAAGGTGATCCTCTTCTGCTT
mRex1		GAGCTGAACTCCTAGCCGCCTAGATT			TTTGGTCAGTGGTATTTGGGGACA
mWnt7b		AGCCAACATCATCTGCAACA			GGAGTTCTTGCCCGAAGAC
mPcdh17		CGTGGTCATTGATTTGAACG			ATCTCCAACATGCCGTTCTC
mGsx1		CGTGTGTCCCCTCTGTGTC			AGCGGGTAGGAGGTCTGGTA
mPax6		CACCAGACTCACCTGACACC			ACCGCCCTTGGTTAAAGTC
mSox1		GTGACATCTGCCCCCATC			GAGGCCAGTCTGGTGTCAG
mGata4		CCCTACCCAGCCTACATGG			ACATATCGAGATTGGGGTGTCT
mGata6		GGTCTCTACAGCAAGATGAATGG			TGGCACAGGACAGTCCAAG
mCxcr4		TGGAACCGATCAGTGTGAGT			GGGCAGGAAGATCCTATTGA
mSox7		CACGCTGCCTGAGAAAAAC			GGGAGTACTCACCCCTGTCC
mFoxa2		AAGTAGCCACCACACTTCAGG			TGTGGCCCATCTATTTAGGG
mBry		GAGATGATTGTGACCAAGAACG			CCAGGCCTGACACATTTACC
mBmp2		GGACCCGCTGTCTTCTAGTG			GTCTCTGCTTCAGGCCAAAC
mBmp4		GAGGAGTTTCCATCACGAAGA			GCTCTGCCGAGGAGATCA
mEomes		CCCTATGGCTCAAATTCCAC			AAGCTCAAGAAAGGAAACATGC
mHand1		CAAGCGGAAAAGGGAGTTG			GTGCGCCCTTTAATCCTCTT
mMixl1		CCATGTACCCAGACATCCACT			CGGTTCTGGAACCACACCT
mMsx2		AGGAGCCCGGCAGATACT			GTTTCCTCAGGGTGCAGGT
mBmal1		AGTACGCCTCCCCCTGAT			TGTCTGGAGTCCCTCCATTT
mArntl2		AGGAGTATCAGCGCAGT			GTCTCTCCGACGCTTTTCC
mHmbs		ACTGGTGGAGTCTGGAGTCTAGATGGC			GCCAGGCTGATGCCCAGGTT
mYhwaz		TCTGGTTGCGAAGCATTGGG			CGTTGTAGGAGCCCGTAGGTCAT
mGapdh		AAGCAGTTGGTGGTGCAGGATG			CGTAGACAAAATGGTGAAGGTCGG
mRNA18s		CGGACAGGATTGACAGATTG			CAAATCGCTCCACCAACTA

## Sheet: Sheet1
Bmal1 guide RNA		Oligo1: 5´-CACCGAACCGGAGAGTAGGTCGGT-3´		Oligo2: 5´-AAACACCGACCTACTCTCCGGTTC-3´
mBmal1 Exon 5		Oligo FW: TCTGCCTGGCTTATTCTTCC		Oligo RV: AGTGCTGCTGGCCATTTAAG
